# Supplementary material for: A scaling approach to estimate the age-dependent COVID-19 infection fatality ratio from incomplete data
Source: PubMed Central journal article supplement (PMC7888669; doi:10.1371/journal.pone.0246831), 2021-02-17
Supplement: pone.0246831.s001.pdf [file pone.0246831.s001.pdf]

| Country           | dates               | Origin of the data (from INED)                                                                                  | Data details                                                                                            | Demographic sources                                                             | Data used for                             |
|-------------------|---------------------|-----------------------------------------------------------------------------------------------------------------|---------------------------------------------------------------------------------------------------------|---------------------------------------------------------------------------------|-------------------------------------------|
| Spain             | 21/05/2020          | Ministerio de Sanidad, Consumo y Bienestar Social (MSCBS)                                                       | Cumulative deaths with confirmed COVID-19 infection occurred in hospitals or elsewhere                  | Instituto Nacional de Estadística (INE) 01/07/2019                              | Figs. 3,4 and 6B and Tables S2, 1, and 2. |
|                   | 21/05/2020          | MSCBS from datadista database                                                                                   | Confirmed cases, hospitalizations, deaths occurred in hospitals or elsewhere, and entries in ICU        | „                                                                               | Figs. 5A                                  |
|                   | 21/05/2020          | Red Nacional de Vigilancia Epidemiológica (RENAVE)                                                              | Deaths occurred in hospitals or elsewhere                                                               | „                                                                               | Figs. 5B                                  |
| Portugal          | 19/05/2020          | Serviço Nacional de Saúde, SNS-Direção Geral da Saúde, DGS                                                      | Cumulative deaths with confirmed COVID-19 infection                                                     | Eurostat, © European Union, 1995-2020                                           | Figs. 3 and 4 and Tables S2, 1, and 2.    |
| Norway            | 20/05/2020          | Folkehelseinstituttet, “COVID-19 Dagsrapport”                                                                   | Cumulative deaths in hospitals and in other health institutions (nursing homes, etc) and homes          | Norway Statistics, Table 07459: “Population, by age and sex, 1986 - 2020”       | Figs. 3 and 4 and Tables S2, 1, and 2.    |
| Netherlands       | 21/05/2020          | Rijksinstituut voor Volksgezondheid en Milieu                                                                   | Cumulative deaths with confirmed COVID-19 infection in hospitals and elsewhere                          | CBS Statistics Netherlands 01/01/2019                                           | Fig 3A.                                   |
| South Korea       | 15/04/2020          | Korea Centers for Disease Control & Prevention (KCDC)                                                           | Cumulative deaths with confirmed COVID-19 infection                                                     | KOSIS (Korean Statistical Information Service) statistical database 23/04/2020. | Figs. 3 and 4 and Tables S2, 1, and 2.    |
| Italy             | 18/05/2020          | Italian National Institute of Health (Istituto superiore di sanità - ISS); Daily Infographics,                  | Cumulative deaths                                                                                       | Italian National Institute of Statistics (Istat) 01/01/2019                     | Figs. 3 and 4 and Tables S2, 1, and 2.    |
| Germany           | 21/05/2020          | Robert Koch-Institut (RKI)                                                                                      | Cumulative deaths with confirmed COVID-19 infection                                                     | Eurostat, © European Union, 1995-2020, 10/04/2020.                              | Figs. 3 and 4 and Tables S2, 1, and 2.    |
| France            | 21/05/2020          | Data are communicated daily by Public Health France (SpF) to the French Institut for Demographic Studies (INED) | Cumulative deaths with confirmed COVID-19 infection occurred in hospitals                               | L’Institut national de la statistique et des études économiques (Insee)         | Figs. 3 and 4 and Tables S2, 1, and 2.    |
|                   | 22/03 to 21/05/2020 | „                                                                                                               | „                                                                                                       | „                                                                               | Figs. 1’                                  |
| England and Wales | 22/05/2020          | Office for National Statistics (ONS). Deaths registered weekly in England and Wales.                            | Cumulative deaths (COVID-19 was mentioned on the death certificate) occurred in hospitals or elsewhere. | Office for National Statistics (ONS) 30/06/2018                                 | Figs. 3 and 4 and Tables S2, 1, and 2.    |
| England           | 22/05/2020          | National Health Service (NHS)                                                                                   | Cumulative deaths with confirmed COVID-19 infection occurred in hospitals.                              | Office for National Statistics (ONS) 30/06/2018                                 | Fig 2.                                    |
| Denmark           | 20/05/2020          | Statens Serum Institut (SSI)                                                                                    | Cumulative deaths with confirmed COVID-19 infection                                                     | Statistics Denmark 01/01/2020                                                   | Figs. 3 and 4 and Tables S2, 1, and 2.    |

**S1 Table.** Source and details of the age-distributed data (by country) used in the analysis. In the last column, we detail the Figures and Tables generated with these data.

All these data are freely available for scientific use at the INED’s website:

<https://dc-covid.site.ined.fr/fr/donnees/> and for free use at the datadista

GitHub: <https://github.com/datadista/datasets/tree/master/COVID%2019>.
